# Supplementary material for: Carbon nanotubes to outperform metal electrodes in perovskite solar cells via dopant engineering and hole-selectivity enhancement
Source: Royal Society of Chemistry journal article supplement (doi:10.1039/d0ta03692g), 2020-01-01
Supplement: d0ta03692g1.pdf [file d0ta03692g1.pdf]

## Electronic supplementary Information (ESI)

### Carbon Nanotubes to Outperform Metal Electrodes in Perovskite Solar Cells via Dopant Engineering and Hole-Selectivity Enhancement

Il Jeon,<sup>\*‡ab</sup> Ahmed Shawky,<sup>‡ac</sup> Seungju Seo,<sup>a</sup> Yang Qian,<sup>a</sup> Anton Anisimov,<sup>d</sup> Esko I. Kauppinen,<sup>e</sup>  
Yutaka Matsuo,<sup>\*a,f</sup> Shigeo Maruyama<sup>\*a,g</sup>

<sup>a</sup>*Department of Mechanical Engineering, The University of Tokyo 7-3-1 Hongo, Bunkyo-ku, Tokyo 113-8656, Japan*

<sup>b</sup>*Department of Chemistry Education, Graduate School of Chemical Materials, Institute for Plastic Information and Energy Materials, Pusan National University, 63-2 Busandaehak-ro, Busan 46241, South Korea*

<sup>c</sup>*Nanomaterials and Nanotechnology Department, Advanced Materials Division, Central Metallurgical R&D Institute (CMRDI), P.O. Box 87 Helwan, Cairo 11421, Egypt*

<sup>d</sup>*Canatu, Ltd., Konalankuja 5, FI-00390 Helsinki, Finland*

<sup>e</sup>*Department of Applied Physics, Aalto University School of Science, P.O. Box 15100, FI-00076 Aalto, Espoo, Finland*

<sup>f</sup>*Institute of Materials Innovation, Institutes of Innovation for Future Society, Nagoya University, Furo-cho, Chikusa-ku, Nagoya 464-8603, Japan*

<sup>g</sup>*Energy NanoEngineering Lab., National Institute of Advanced Industrial Science and Technology (AIST), Tsukuba, 305-8564, Japan*

#### AUTHOR INFORMATION

#### \*Corresponding Authors

\*il.jeon@spc.oxon.org; \*matsuo@photon.t.u-tokyo.ac.jp; \*maruyama@photon.t.u-tokyo.ac.jp

## Experimental Methods

**Aerosol CNT films Preparation.** CNTs were synthesised by an aerosol (floating catalyst) CVD method based on ferrocene vapour decomposition in a CO atmosphere. The catalyst precursor was vaporised by passing ambient temperature CO through a cartridge filled with ferrocene powder. The flow containing ferrocene vapour was then introduced into the high-temperature zone of a ceramic tube reactor through a water-cooled probe and mixed with additional CO. To obtain a stable growth of CNTs, a controlled amount of CO<sub>2</sub> was added together with the carbon source, CO. CNTs were directly collected downstream of the reactor by filtering the flow through a nitrocellulose membrane filter (Millipore Corp., USA; HAWP, 0.45 µm pore diameter). The time of collection determines the transparency and the conductivity of the CNT films.

**MAPbI<sub>3</sub> solution preparation.** CH<sub>3</sub>NH<sub>3</sub>I (Aldrich), PbI<sub>2</sub> (TCI), and anhydrous dimethyl sulfoxide (TCI) (molar ratio 1:1:1) were mixed in anhydrous *N,N*-dimethylformamide (TCI) with a concentration of 50 wt%. The solution was filtered through a 0.2 µm poly(tetrafluoroethylene) filter before use.

**Perovskite Solar Cell Fabrication.** ITO patterned glass substrates were cleaned and sonicated with detergent, distilled water, acetone, and isopropanol in an ultrasonic bath for 15 min, respectively. The cleaned substrates underwent the UV-ozone for wettability enhancement and removal of any organic contamination. 30 millimolar SnCl<sub>2</sub>·2H<sub>2</sub>O (Aldrich, >99.995%) solution in ethanol (anhydrous, Fujifilm Wako Pure Chemical Co.) as a precursor solution was used for deposition of a compact SnO<sub>2</sub> layer. The solution was filtered by a 0.2 µm syringe filter, followed by spin-coating on the cleaned substrate at 3000 rpm for 30 s. The spin-coated film was annealed at 165 °C for 30 min. After cooling down to room temperature, another cycle of the spin-coating

process was repeated, which was followed by annealing at 150 °C for 5 min and 190 °C for 1 h. The SnO<sub>2</sub>-coated ITO glass was treated with UV-ozone before spin-coating of the prepared perovskite solution. Then, 20 µL of perovskite precursor solution was spin-coated onto the SnO<sub>2</sub> layer at 4000 rpm for 20 s, with 0.15–0.30 mL of anhydrous diethyl ether slowly dripped onto the substrate 12 s after the start of the spin-coating process. Next, the film was annealed at 100 °C for 10 min to obtain a dense brown MAPbI<sub>3</sub> film.

For the CNT-based devices, pre-cut CNT films of different transparencies (active area 5x2 mm<sup>2</sup>) were laminated on the top of the prepared MAPbI<sub>3</sub>/SnO<sub>2</sub>/ITO/glass substrates to room temperature by applying press-transfer method on the perovskite surface just after cooling. Before depositing the hole transporting layer (HTL), a 20 µL solution containing different concentrations of TFMS in ODCB (0.01, 0.015, 0.02, 0.025 and 0.05 wt%) was spin-coated on the CNT-laminated PSCs at 300 rpm for 30 s. Then, the HTL solution was prepared by dissolving 85.8 mg of spiro-MeOTAD (Merck) in 1 mL of chlorobenzene (anhydrous, 99.8%, Sigma-Aldrich) which was mixed with 33.8 µL of 4-tert-butylpyridine (96%, Aldrich) and 19.3 µL of Li-TFSI (99.95%, Aldrich, 520 mg mL<sup>-1</sup> in acetonitrile) solution. Different concentrations of HTL tested were by a factor of 0.9, 0.95, 1.0, 1.05, 1.085, 1.17, 1.25, and 1.4. The spiro-MeOTAD solution was spin-coated on the perovskite layer at 3000 rpm for 30 s by dropping 20 µL of the solution. The fabrication was finally completed by thermal evaporation of a 50-nm-thick film of gold electrode (3x3 mm<sup>2</sup> active area) for the reference devices only at a constant evaporation rate of 0.05 nm s<sup>-1</sup>.

**Characterisations.** The *J–V* curves were measured using a software-controlled source meter (Keithley 2400 Source-Meter) under dark conditions and the simulated sunlight irradiation of 1 sun (AM 1.5G; 100 mW cm<sup>-2</sup>) using a solar simulator (EMS- 35AAA, Ushio Spax Inc.) with a Ushio Xe short arc lamp 500. The source meter was calibrated using a silicon diode (BS-520BK,

Bunkokeiki). By using Agilent 4156C analyser with a four-probe station, the sheet resistance of CNT films were measured (van der Pauw method). The SEM analysis of the CNTs and device cross-section were performed using an S-4800 (Hitachi) electron microscope. The SEM images were analysed by ImageJ software. An inVia Raman microscope (Renishaw) was employed for the vibrational spectra observation of CNT and doped-CNT electrodes with 532 nm laser wavelength. Shimadzu UV-3150 was used for the UV–Vis–NIR measurement. The PL measurements were performed using JASCO Spectrofluorometer (FP-8300). The valence band and the Fermi levels measurements were performed using Riken Keiki PYS-A AC-2 and Kelvin probe spectroscopy in air (ESA), respectively. A source measurement unit was used to record the current at each specific wavelength. Solartron SI1287 Electrochemical Interface and Solartron 1255B Frequency Response Analyser were used for the Impedance Measurement.

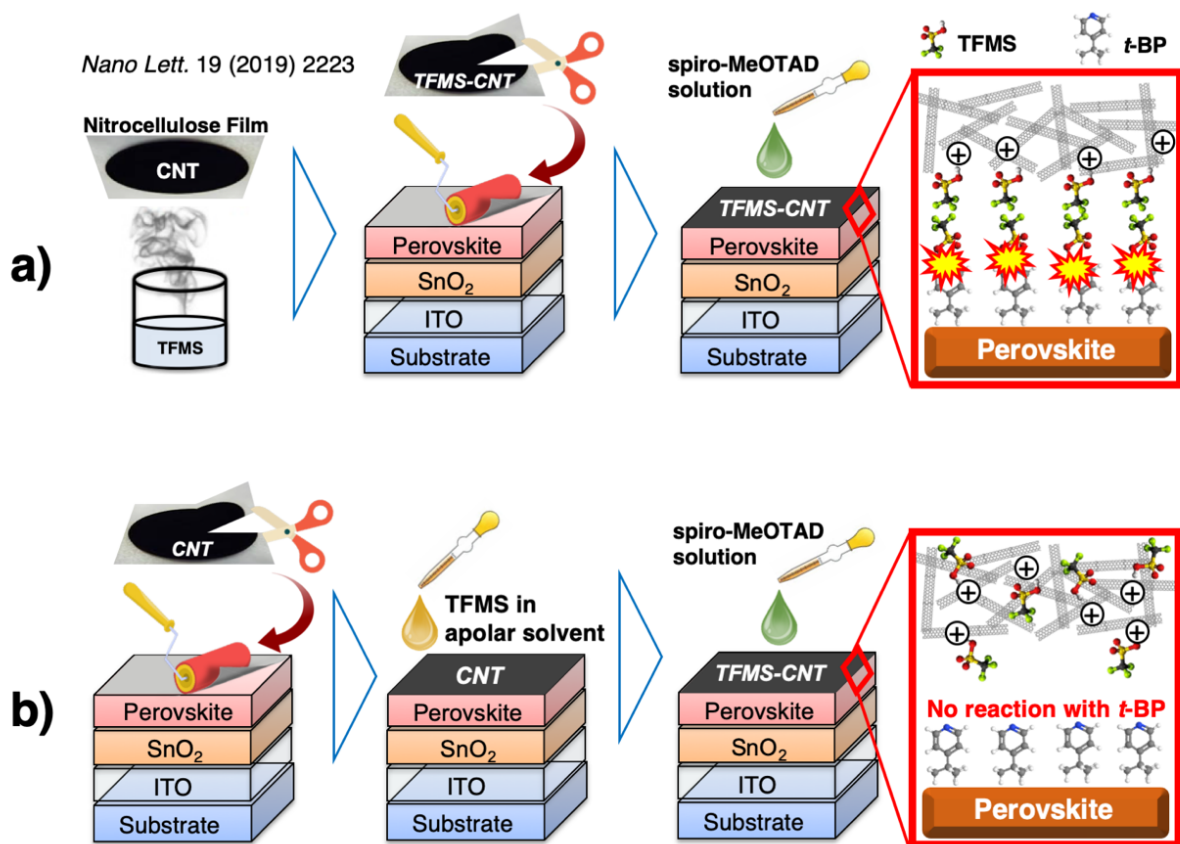

**Fig. S1.** Illustration of top CNT electrode *p*-doping and fabrications a) of our previous work (Reproduced with permission [17] Copyright 2017, American Chemical Society) and b) of this work.

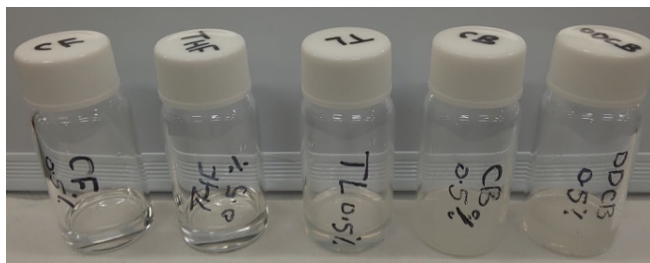

**Fig. S2.** TFMS dispersed in various non-polar solvent (CF, THF, toluene, CB and ODCB). The solution appears transparent or murky depending on solvents.

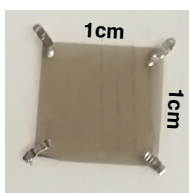

**Fig. S3.** Indium contact applied T60% CNT for the four probe Van der Pauw method.

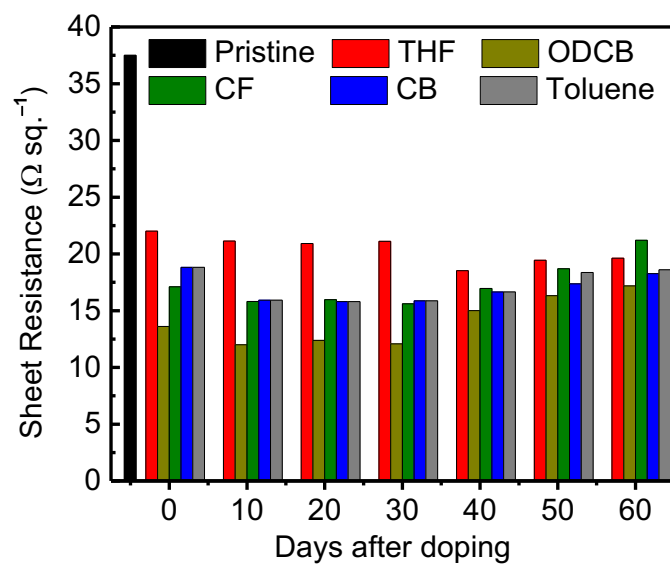

**Fig. S4.** A bar graph showing the sheet resistance changes upon TFMS doping in different apolar solvents and their durability.

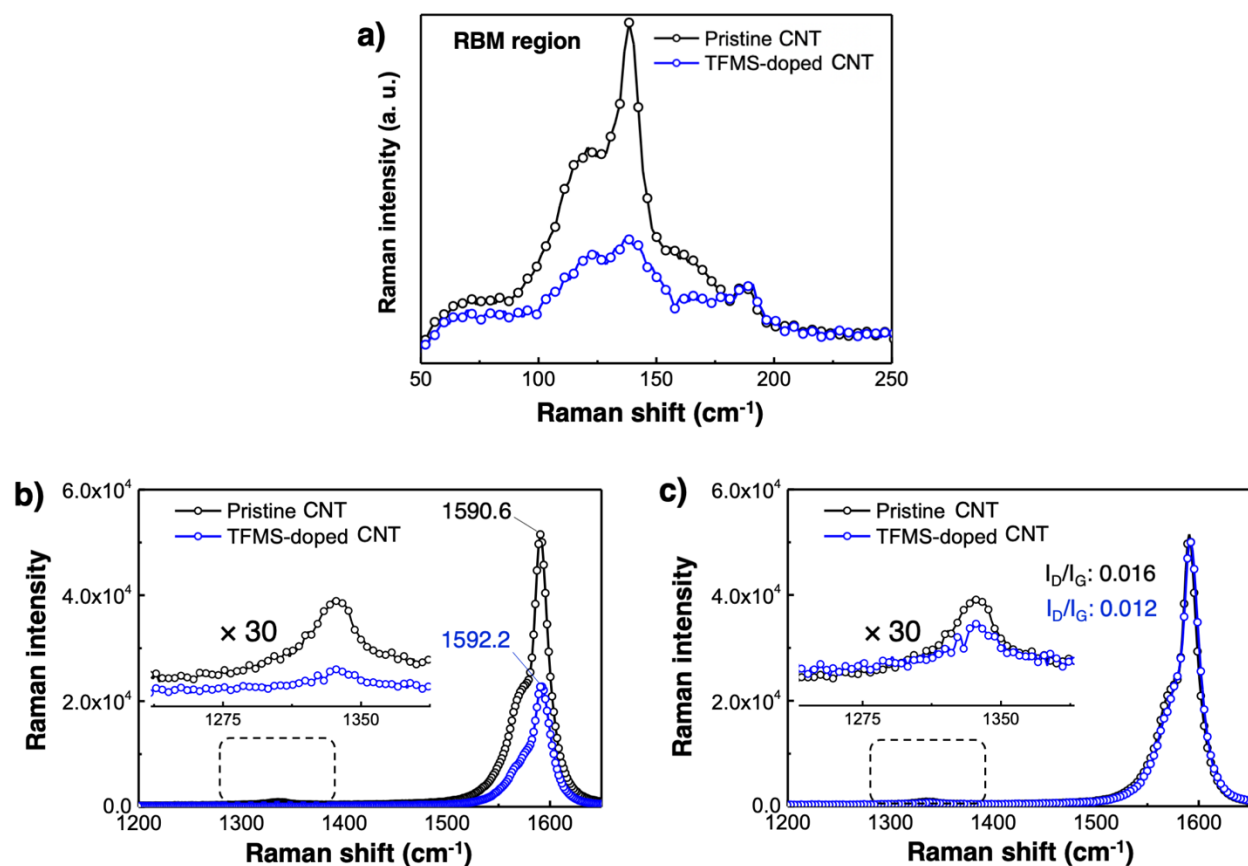

**Fig. S5.** a) RBM region, b) the G-band, and c) The G-to-D ratio of the Raman spectra of a pristine CNT film (black), and a TFMS-applied CNT film.

**Table S1.** Photovoltaic parameters of varying concentrations of TFMS-applied CNT-based PSCs under AM1.5G 1 sun illumination.

| TFMS conc. | $J_{sc}$ (mA cm <sup>-2</sup> ) | $V_{oc}$ (V) | FF   | PCE (%) [average $\pm$ error] |
|------------|---------------------------------|--------------|------|-------------------------------|
| 0          | 19.8                            | 0.97         | 0.59 | 11.3 [10.3 $\pm$ 0.73]        |
| 0.010 wt.% | 20.3                            | 1.00         | 0.60 | 12.1 [10.8 $\pm$ 0.90]        |
| 0.015 wt.% | 20.6                            | 1.03         | 0.62 | 13.2 [12.4 $\pm$ 0.60]        |
| 0.020 wt.% | 15.9                            | 0.87         | 0.49 | 6.9 [6.5 $\pm$ 0.35]          |
| 0.025 wt.% | 15.5                            | 0.80         | 0.40 | 5.0 [4.5 $\pm$ 0.63]          |
| 0.050 wt.% | 4.6                             | 0.66         | 0.33 | 1.1 [0.84 $\pm$ 0.28]         |

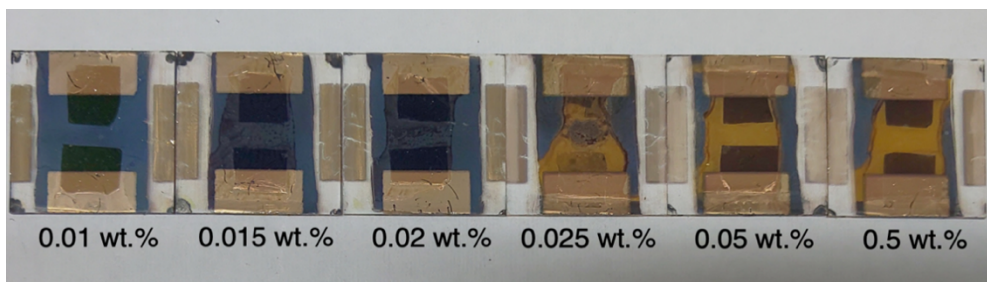

**Fig. S6.** Pictures of the CNT-PSCs upon various concentrations of TFMS application.

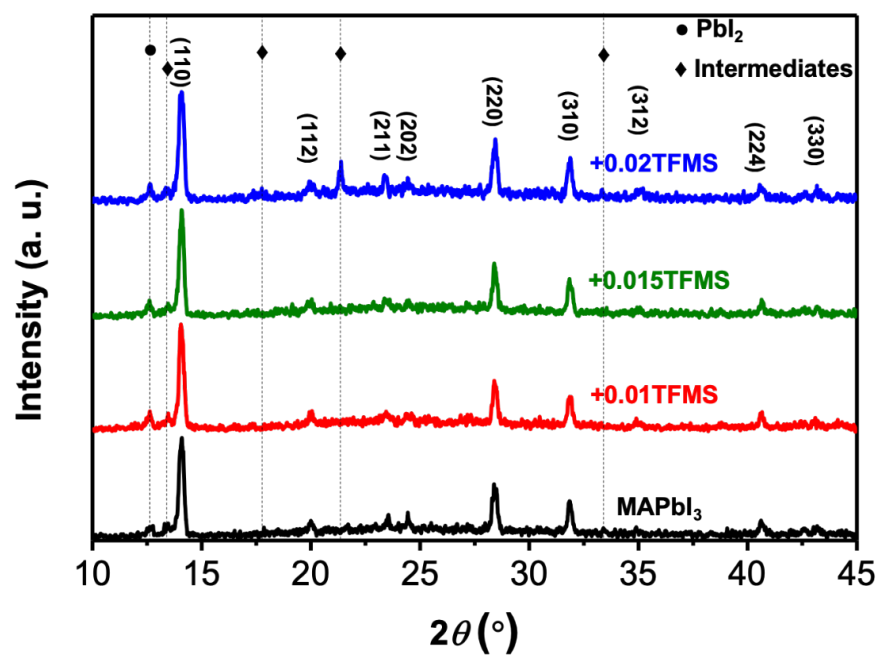

**Fig. S7.** XRD spectra of the perovskite films after various concentrations of TFMS doping.



**Table S2.** Photovoltaic parameters of CNT-PSCs upon TFMS doping and spiro-MeOTAD application under AM1.5G 1 sun illumination.

| Device type              | $J_{sc}$<br>(mA cm <sup>-2</sup> ) | $V_{oc}$<br>(V) | FF   | $R_s$<br>( $\Omega$ ) | $R_{sh}$<br>( $\times 10^4 \Omega$ ) | PCE   |
|--------------------------|------------------------------------|-----------------|------|-----------------------|--------------------------------------|-------|
| Pristine                 | 19.8                               | 0.97            | 0.59 | 62.9 $\pm$ 7.6        | 1.5 $\pm$ 1.3                        | 11.4% |
| TFMS-doped               | 20.6                               | 1.03            | 0.62 | 51.5 $\pm$ 2.4        | 2.3 $\pm$ 2.1                        | 13.2% |
| HTL-applied              | 21.7                               | 1.04            | 0.67 | 57.7 $\pm$ 9.8        | 5.6 $\pm$ 2.7                        | 15.3% |
| TFMS-doped & HTL-applied | 1.08                               | 1.08            | 0.69 | 51.5 $\pm$ 4.7        | 10 $\pm$ 3.0                         | 17.0% |

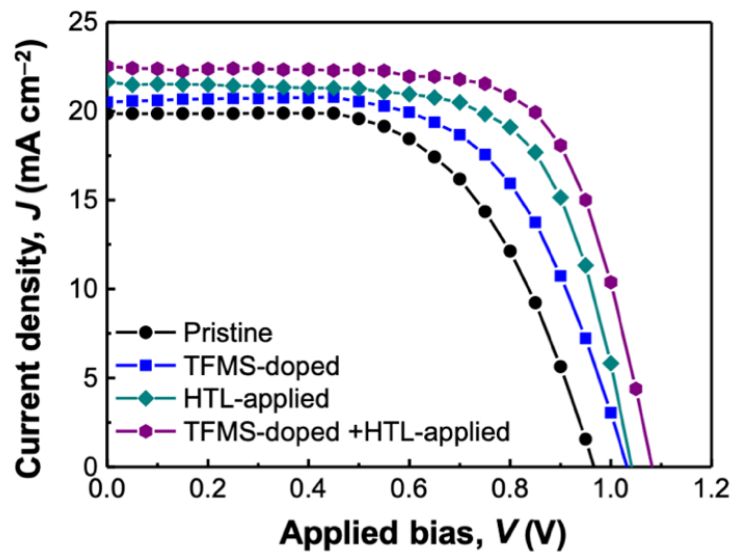

**Fig. S8.**  $J$ - $V$  curves of the CNT-PSC (black circles), the 0.15 wt.% TFMS-doped CNT-PSC (blue squares), the HTL-applied CNT-PSC (turquoise diamonds), and the 0.15 wt.% TFMS-doped HTL-applied CNT-PSC (purple circles).

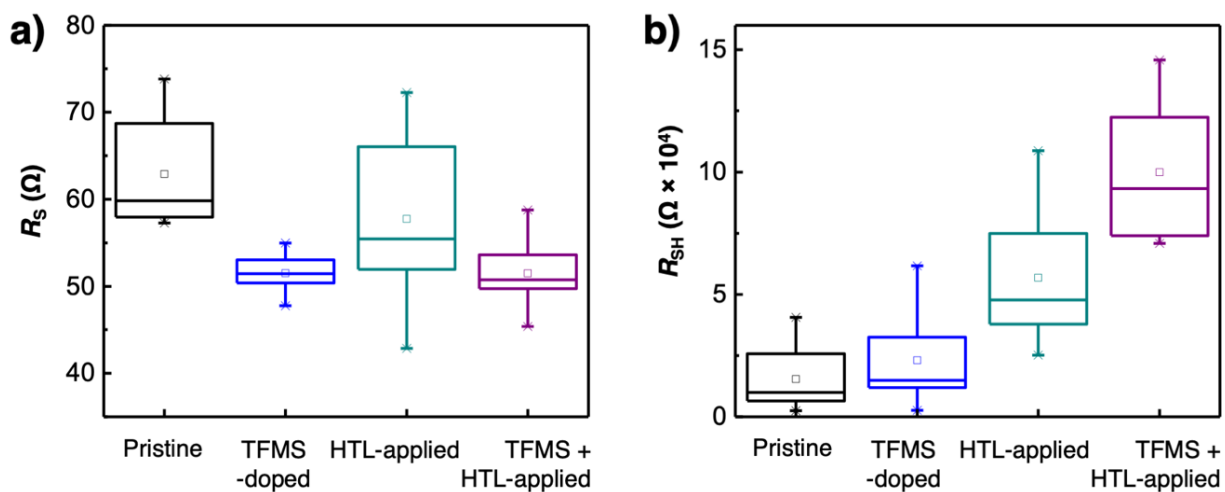

**Fig. S9.** a)  $R_s$  and b)  $R_{sh}$  values of the CNT-PSC (black), the TFMS-doped CNT-PSC (blue), the HTL-applied CNT-PSC (turquoise), and the TFMS-doped HTL-applied CNT-PSC (purple).

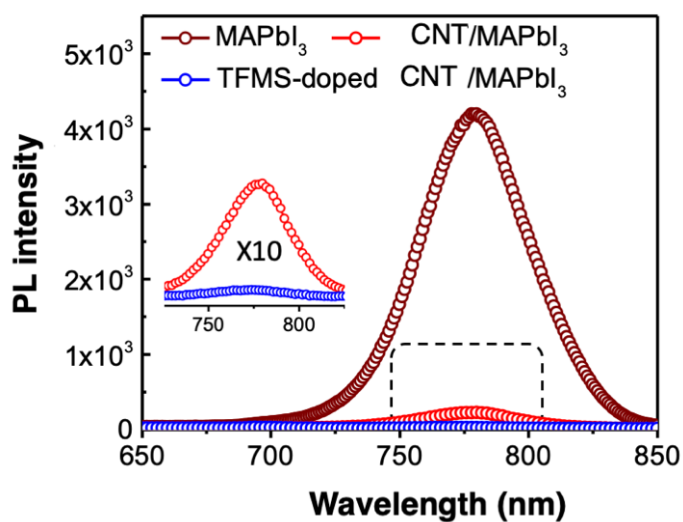

**Fig. S10.** PL spectra of the MAPbI<sub>3</sub> film (brown), CNT on the MAPbI<sub>3</sub> film (red), and TFMS-doped CNT on the MAPbI<sub>3</sub> film (blue).

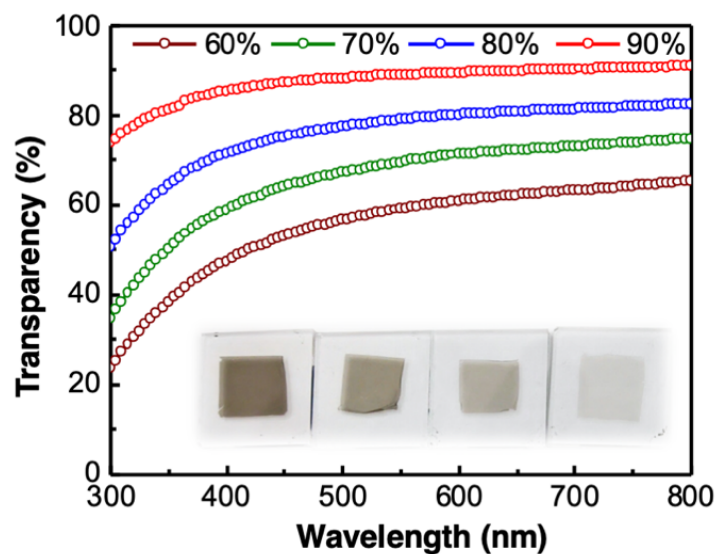

**Fig. S11.** Transmittance spectra of CNT films with different densities, namely, T90%-CNT (red squares), T80%-CNT (blue squares), T70%-CNT (green squares), and T60%-CNT (brown squares) and the photos as an inset.

**Table S3.** Sheet resistance of CNT films with different densities before and after doping.

| CNT type | Sheet Resistance ( $\Omega \text{ sq}^{-1}$ ) | After 0.05 wt.%TFMS doping ( $\Omega \text{ sq}^{-1}$ ) |
|----------|-----------------------------------------------|---------------------------------------------------------|
| T90%     | 100 $\pm$ 12.1                                | 81 $\pm$ 14.0                                           |
| T80%     | 80.9 $\pm$ 1.25                               | 68.8 $\pm$ 2.74                                         |
| T70%     | 57.4 $\pm$ 1.72                               | 35.5 $\pm$ 3.98                                         |
| T60%     | 36.5 $\pm$ 0.88                               | 28.4 $\pm$ 1.82                                         |

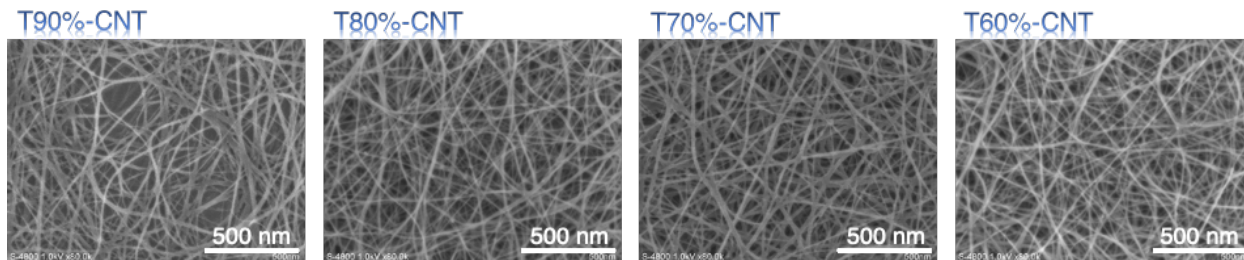

**Fig. S12.** SEM images of T90%-CNT, T80%-CNT, T70%-CNT and T60%-CNT.

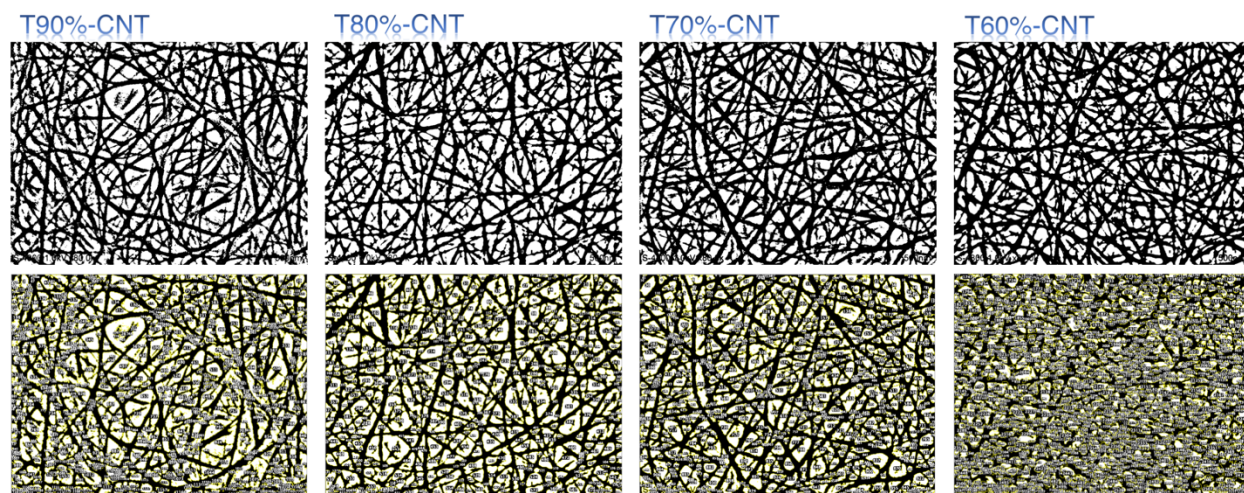

**Fig. S13.** Processed SEM images of T90%-CNT, T80%-CNT, T70%-CNT and T60%-CNT.

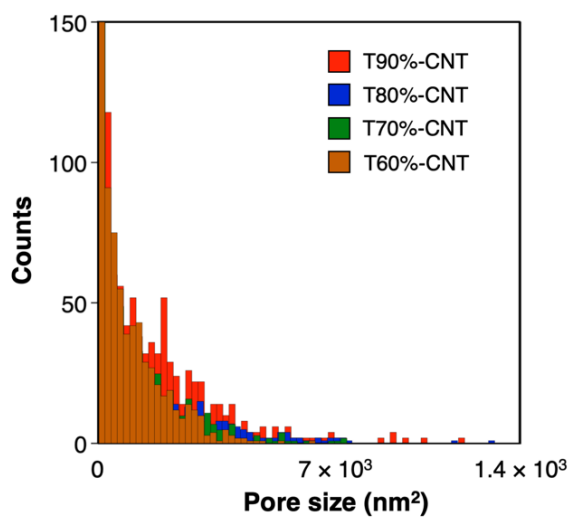

**Fig. S14.** Pore size distribution of different CNT density films as indicated.

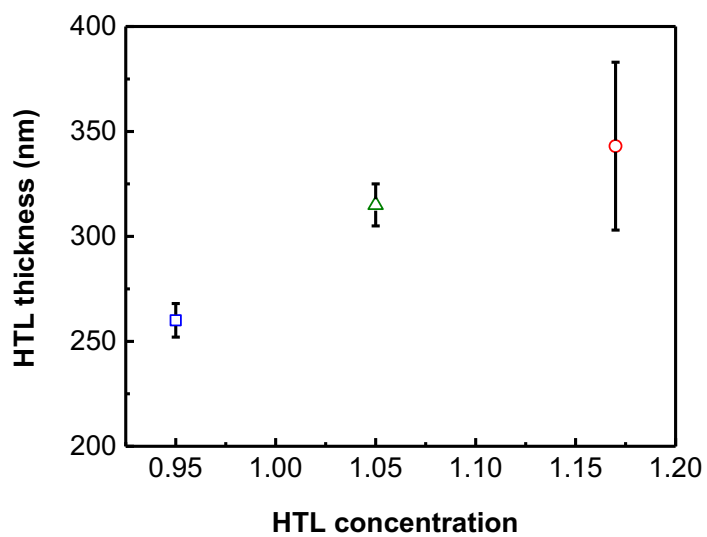

**Fig. S15.** Thickness of spiro-MeOTAD on a perovskite film measured by a profilometer.

**Table S4.** Thickness of spiro-MeOTAD on a perovskite film measured by a profilometer.

| HTL concentration | Thickness(nm) |
|-------------------|---------------|
| x 0.95            | 260±8         |
| x 1.05            | 315±10        |
| x 1.17            | 343±40        |

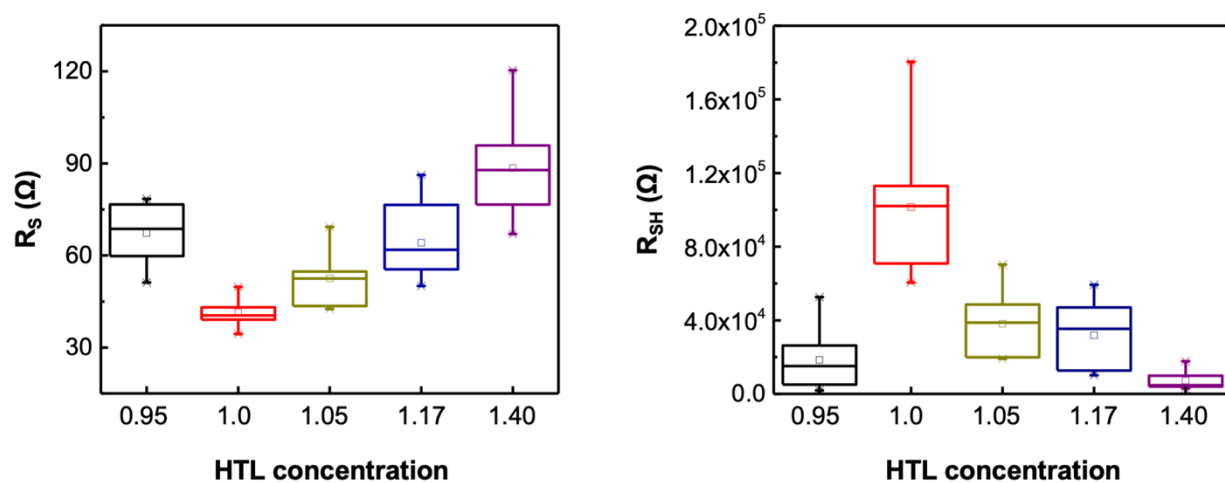

**Fig. S16.**  $R_s$  and  $R_{sh}$  of different spiro-MeOTAD concentrations in Au-based PSC devices.

**Table S5.**  $R_s$  and  $R_{sh}$  of different spiro-MeOTAD concentrations in Au-based PSC devices.

| HTL concentration | $R_s$ ( $\Omega$ ) | $R_{sh}$ ( $\times 10^4 \Omega$ ) |
|-------------------|--------------------|-----------------------------------|
| x 0.95            | 67.3 $\pm$ 10.1    | 1.8 $\pm$ 1.7                     |
| x 1.00            | 41.1 $\pm$ 4.4     | 10.1 $\pm$ 3.7                    |
| x 1.05            | 52.5 $\pm$ 8.8     | 3.8 $\pm$ 1.9                     |
| x 1.17            | 64.1 $\pm$ 12.8    | 3.2 $\pm$ 1.8                     |
| x 1.40            | 88.5 $\pm$ 16.8    | 0.7 $\pm$ 0.5                     |

**Table S6.**  $R_S$  and  $R_{CT}$  values derived from the Nyquist plot of the EIS measurement.

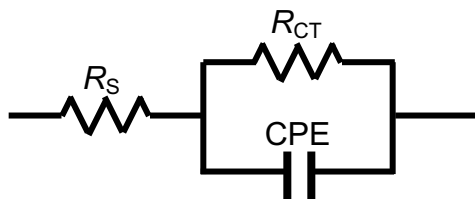

| HTL conc. | $R_S$ ( $\Omega$ ) | $R_{CT}$ ( $\Omega$ ) |
|-----------|--------------------|-----------------------|
| x0.95     | 32.5               | 106.2                 |
| x1.05     | 26.2               | 142.8                 |
| x1.17     | 23.5               | 157.1                 |

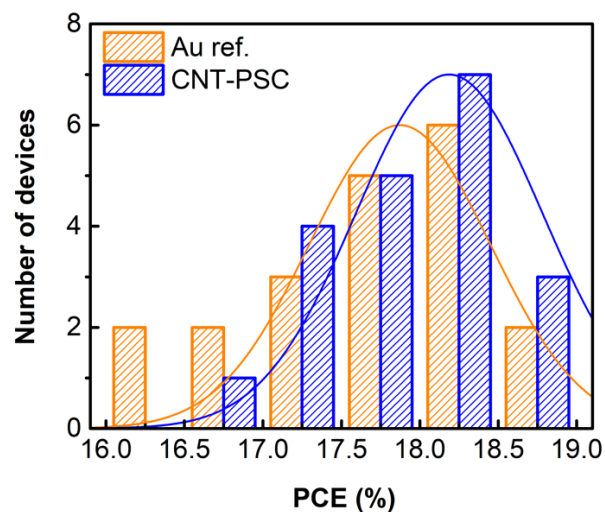

**Fig. S17.** Statistical analysis of PCEs of the Au-based PSCs and the CNT-based PSCs collected from 20 devices each.

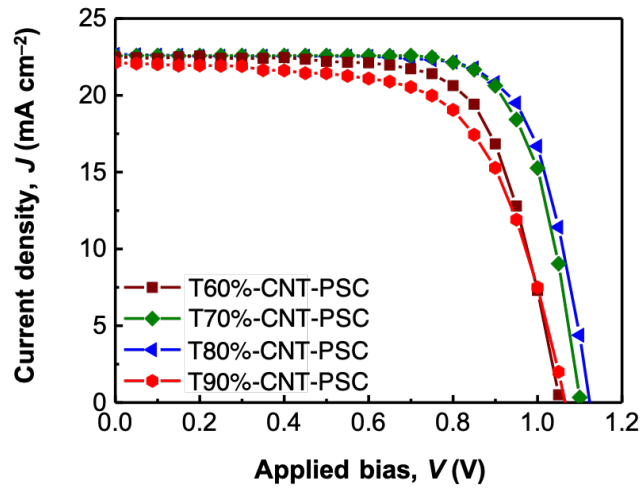

**Fig. S18.**  $J$ - $V$  curves of the champion T60%-CNT-PSC (brown square), T70%-CNT-PSC (green diamond), T80%-CNT-PSC (blue triangle) and T90%-CNT-PSC (red hexagon).

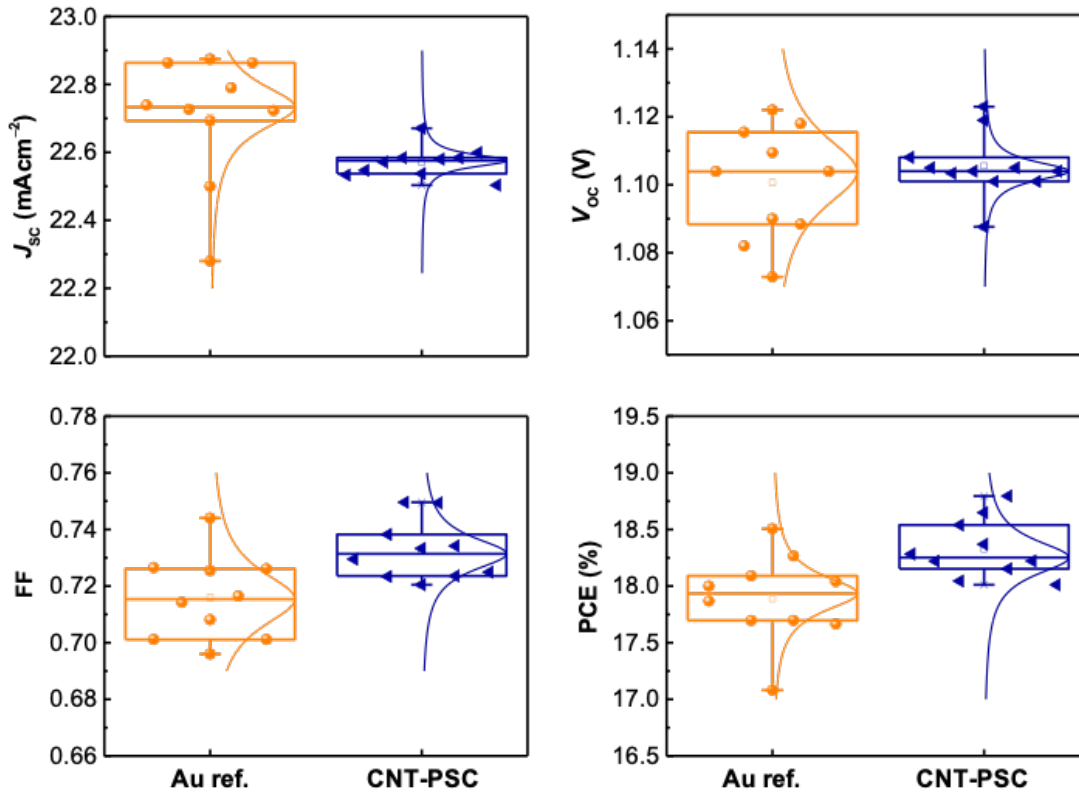

**Fig. S19.** Statistical analyses of the photovoltaic parameters from the best 10 devices with the device points (Fig. 5c).



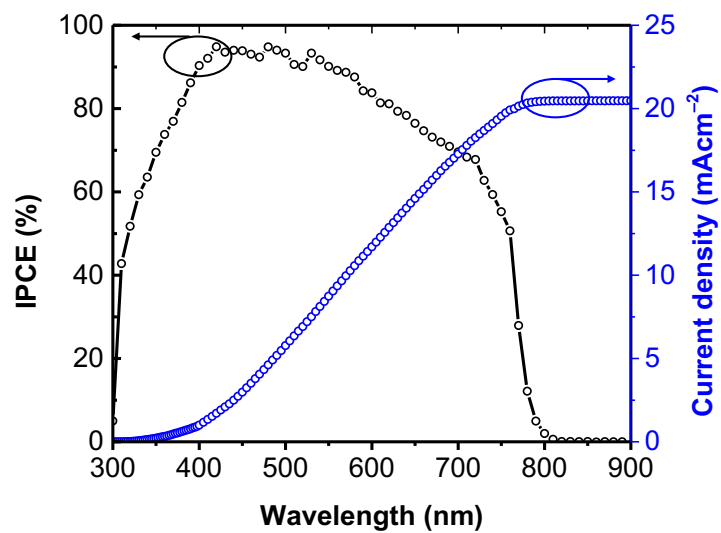

**Fig. S20.** IPCE (black line) and accumulative current density (red line) of the T80%-CNT-PSC.

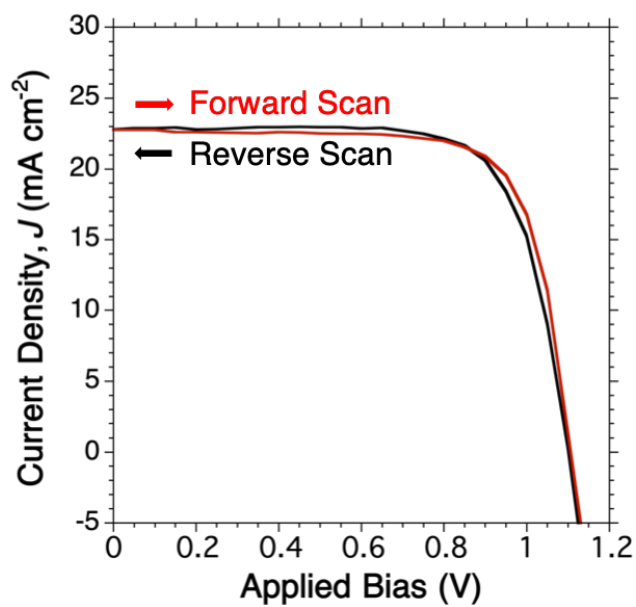

**Fig. S21.**  $J$ - $V$  curves of the T80%-CNT-PSC with both scan directions.

**Table S7.** Reported PCEs of the CNT-based PSCs. SWNT stands for single-walled CNT, DWNT stands for double-walled CNT, CSCNT stands for cross-stacked CNT and MWNT stands for multi-walled CNT. The citation numbers are referenced to the reference list of the main text.

|     | Year | CNT Type           | Electrode Type   | PCE (%) | Control (%) | Citation  |
|-----|------|--------------------|------------------|---------|-------------|-----------|
| n/a | 2020 | SWNT               | Top Electrode    | 18.8    | 18.4        | This work |
| a   | 2019 | DWNT               | Bottom Electrode | 17.2    | n/a         | [42]      |
| b   | 2018 | SWNT               | Top Electrode    | 17.56   | n/a         | [17]      |
| c   | 2018 | SWNT               | Top Electrode    | 15.3~17 | n/a         | [13]      |
| d   | 2018 | CSCNT(MWNT)        | Top Electrode    | 11.9    | n/a         | [48]      |
| e   | 2018 | SWNT               | Top Electrode    | 11.8    | n/a         | [47]      |
| f   | 2017 | SWNT               | Top Electrode    | 16.6    | 18.4        | [12]      |
| g   | 2017 | SWNT               | Bottom Electrode | 15.3    | 17.7        | [29]      |
| h   | 2017 | B-doped MWNT       | Top Electrode    | 14.6    | n/a         | [49]      |
| i   | 2017 | CSCNT<br>(MWNT)    | Top Electrode    | 14.3    | 16 (rigid)  | [50]      |
| j   | 2017 | SWNT/NiO           | Top Electrode    | 12.7    | n/a         | [51]      |
| k   | 2016 | SWNT               | Top Electrode    | 15.5    | 18.8        | [52]      |
| l   | 2016 | C/SWNT             | Top Electrode    | 14.7    | n/a         | [53]      |
| m   | 2016 | CSCNT (MWNT)       | Top Electrode    | 10.54   | 14.76       | [54]      |
| n   | 2015 | MWNT               | Top Electrode    | 12.67   | n/a         | [55]      |
| o   | 2015 | SWNT               | Bottom Electrode | 6.32    | 9.5         | [56]      |
| p   | 2015 | Twisted MWNT fiber | Top Electrode    | 3.03    | 2.8         | [57]      |

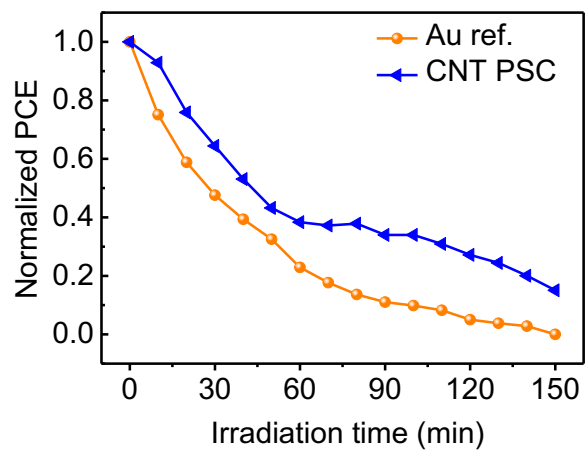

**Fig. S22.** Device stability data of the unencapsulated Au-based PSC (orange circles) and the unencapsulated TFMS-treated T80%-CNT-PSC (blue triangles) under constant illumination of one sun.
